# Supplementary material
Source: PubMed Central journal article supplement (PMC9872822)
Supplement: 8008_Appendix.pdf [file 8008_Appendix.pdf]

**APPENDIX**

**Appendix A. Variables used for statistical analysis across years within the BRFSS datasets**

**Consistent variables across years of BRFSS datasets:** type of cancer (CNCRTYP1), age (\_AGE80), income (\_INCOMG), smoking status (SMOKER3), body mass index (\_bmi5cat), physical health status (\_PHYS14D), and physical activity or exercise (\_TOTINDA).

**Inconsistent variables across years of BRFSS datasets** gender (SEX in 2016/2017, SEX1 in 2018, and \_SEX in 2019/2020) and treatment status (CSRVTRT1 in 2016, CSRVTRT2 in 2017/2018, and CSRVTRT3 in 2019/2020).

*All variables of interest were got a unified label before appending the datasets for analysis.*

| <b>Appendix B. Sensitivity analysis for time from diagnosis to survey</b> |                                |          |
|---------------------------------------------------------------------------|--------------------------------|----------|
| <b>Variables</b>                                                          | <b>Odds ratio<br/>(95% CI)</b> | <b>P</b> |
| Age (continuous)                                                          | 0.96 (0.94–0.99)               | 0.013    |
| Time from diagnosis to survey                                             | 0.99 (0.96–1.02)               | 0.612    |
| Gender                                                                    |                                |          |
| Female                                                                    | Ref                            |          |
| Male                                                                      | 1.15 (0.64–2.06)               | 0.639    |
| Income                                                                    |                                |          |
| \$0–14 999                                                                | Ref                            |          |
| \$15 000–24 999                                                           | 0.58 (0.22–1.53)               | 0.269    |
| \$25 000–34 999                                                           | 0.42 (0.14–1.30)               | 0.133    |
| \$35 000–49 999                                                           | 0.38 (0.14–1.02)               | 0.054    |
| \$50 000 or more                                                          | 0.40 (0.16–0.99)               | <0.048   |
| Smoking status                                                            |                                |          |
| Never smoked                                                              | Ref                            |          |
| Current smoker                                                            | 2.52 (1.15–5.49)               | 0.020    |
| Former smoker                                                             | 1.80 (0.92–3.50)               | 0.086    |
| Body mass index                                                           |                                |          |
| Normal weight (18.5–24.9)                                                 | Ref                            |          |
| Underweight (<18.5)                                                       | 1.28 (0.18–9.20)               | 0.807    |
| Overweight (25–29.9)                                                      | 1.26 (0.60–2.64)               | 0.545    |
| Obese (>30)                                                               | 1.79 (0.85–3.76)               | 0.123    |
| Are you currently receiving treatment for cancer?                         |                                |          |
| No, I've completed treatment                                              | Ref                            |          |
| Yes                                                                       | 2.18 (1.41–5.58)               | 0.003    |

*Koelker M, et al. Impact of exercise on physical health status in bladder cancer patients*

|                                                                   |                  |        |
|-------------------------------------------------------------------|------------------|--------|
| No, I haven't started treatment                                   | 1.45 (0.40–5.22) | 0.573  |
| Don't know/not sure                                               | 0.94 (0.11–8.01) | 0.956  |
| Treatment was not necessary                                       | 1.49 (0.66–3.38) | 0.338  |
| Physical activity/exercise outside of regular job in last 30 days |                  |        |
| No physical activity in last 30 days                              | Ref              |        |
| Yes, physical activity in last 30 days                            | 0.39 (0.23–0.67) | <0.001 |
